# Supplementary material for: Granzyme B cleaves tenascin-C to release its C-terminal domain in rheumatoid arthritis
Source: PubMed Central journal article supplement (PMC11623945; doi:10.1172/jci.insight.181935), 2024-10-30

# Full unedited membranes for figure 2A

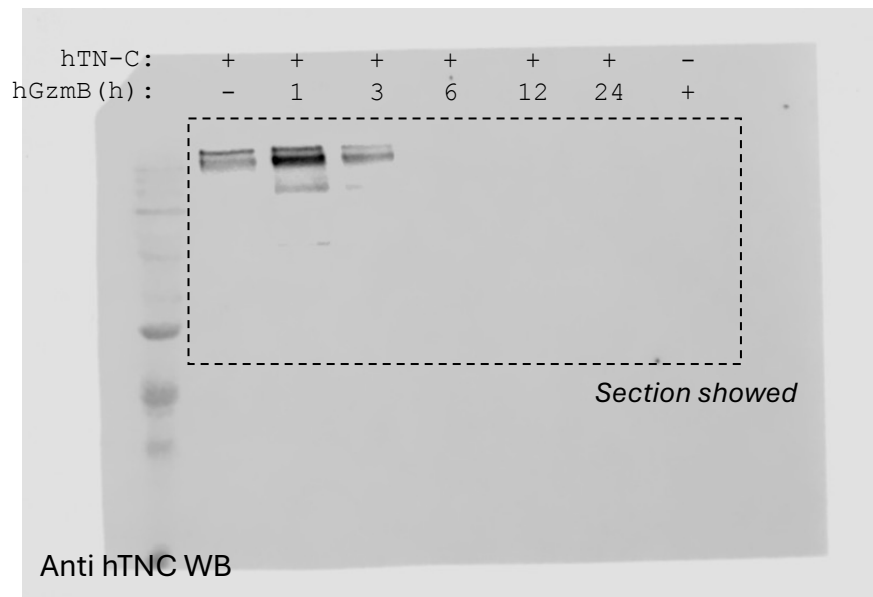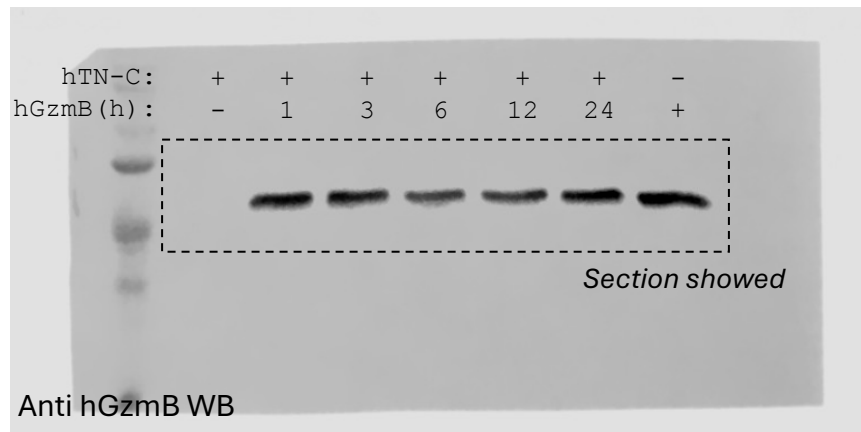

# Full unedited membranes for figure 2B

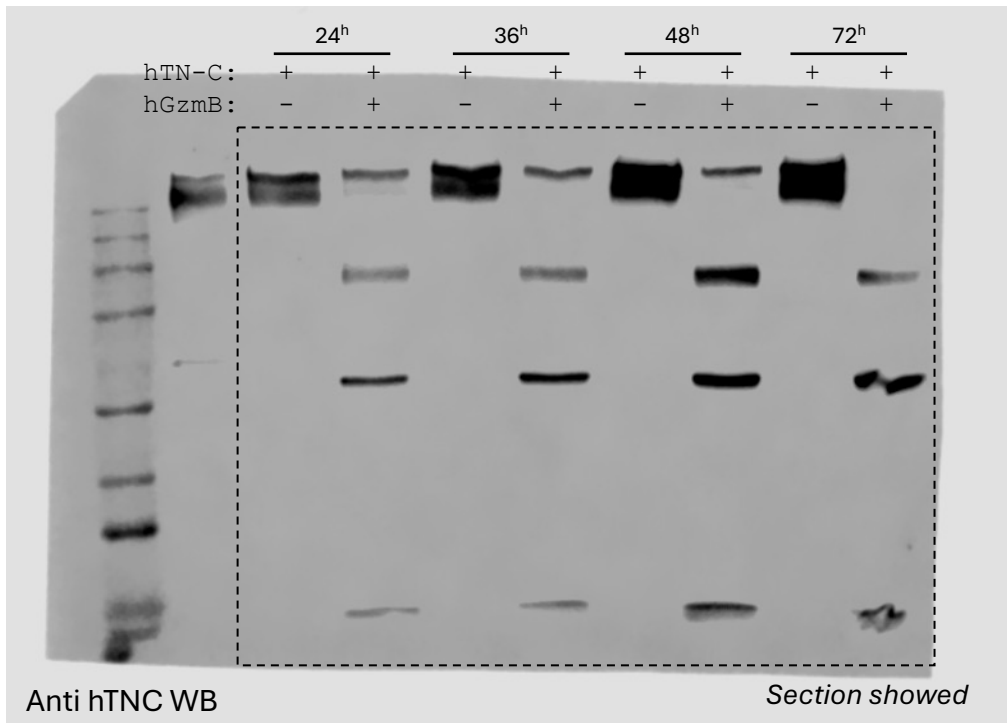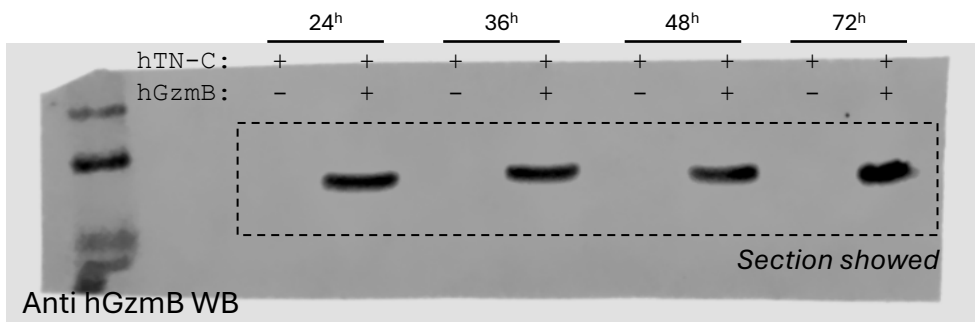

# Full unedited membranes for figure 2D

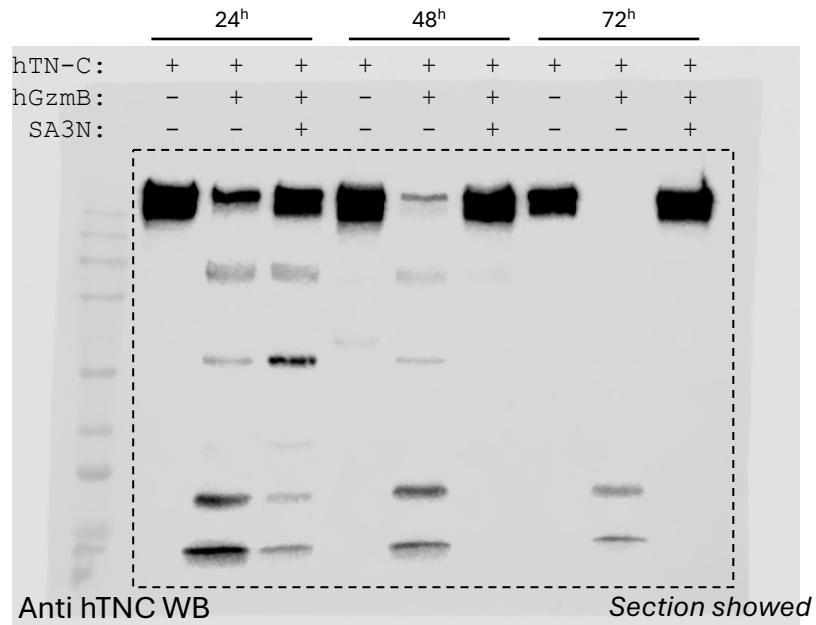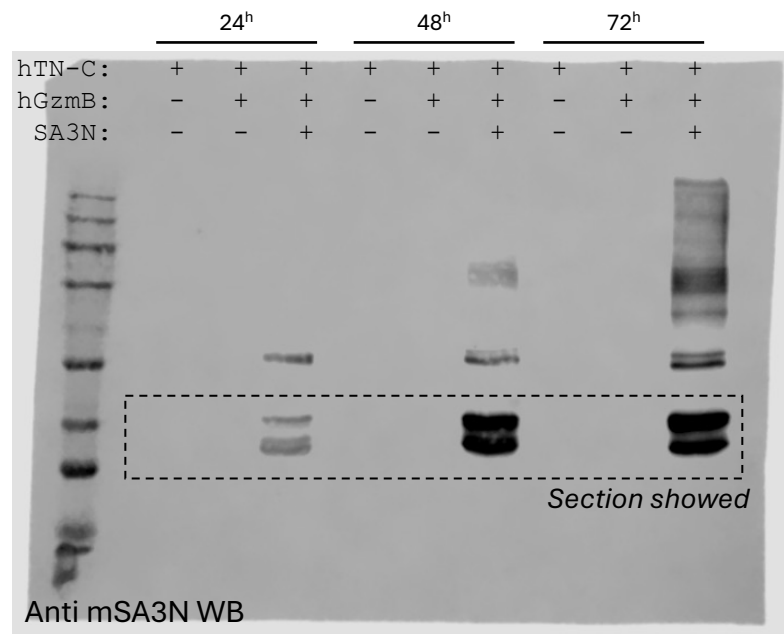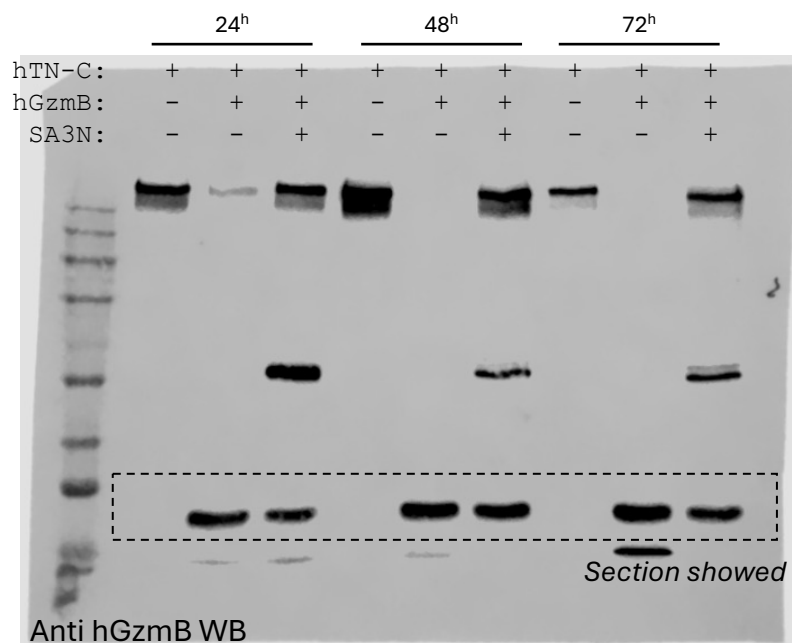

# Full unedited membrane for figure 3B

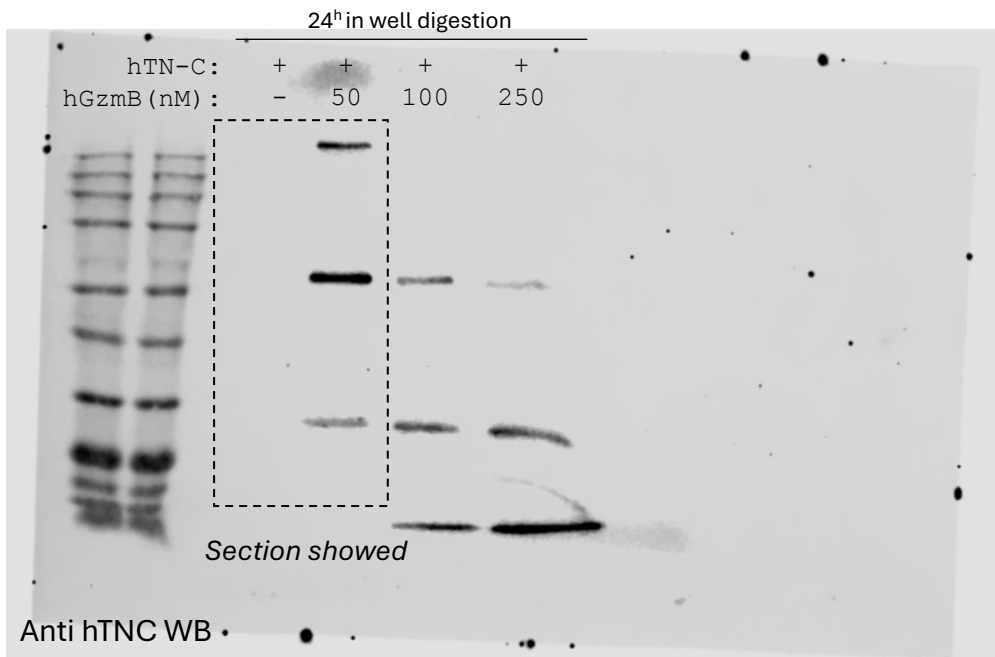

Full unedited membranes for figure 5D (RA Synovial fluids)

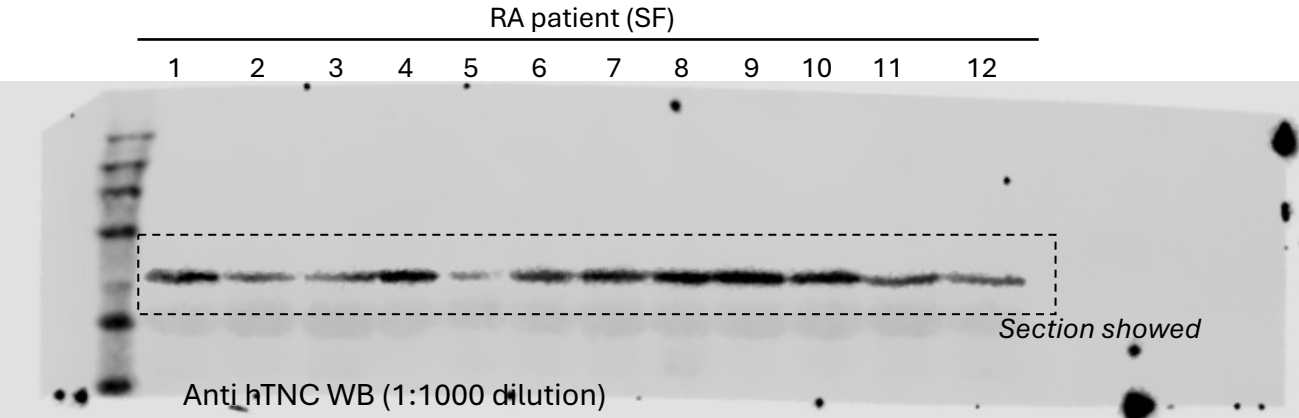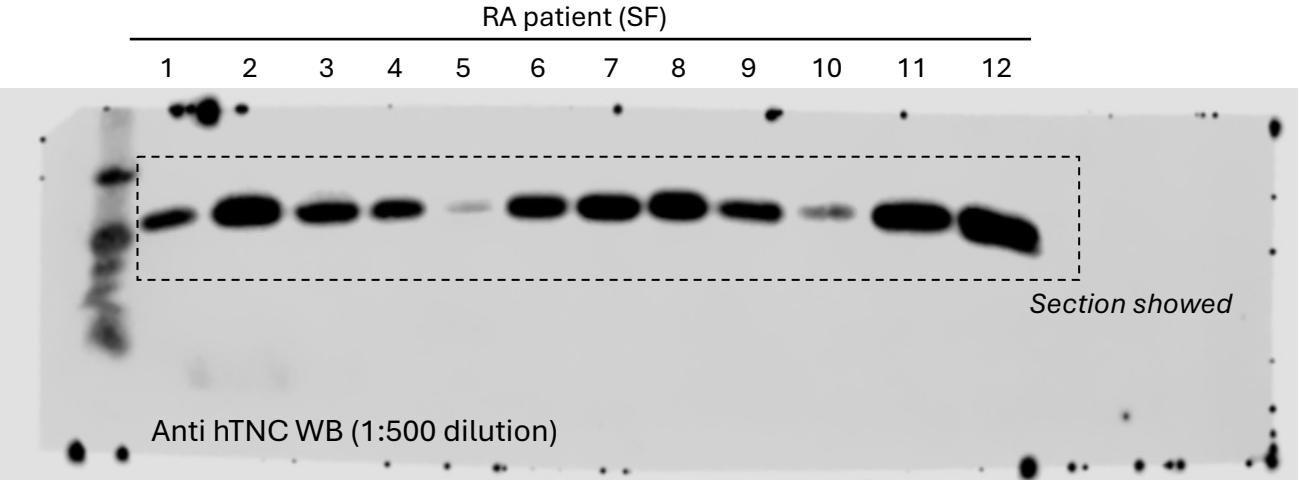

# Full unedited membranes for figure 6A - left panel (50nM GzmK)

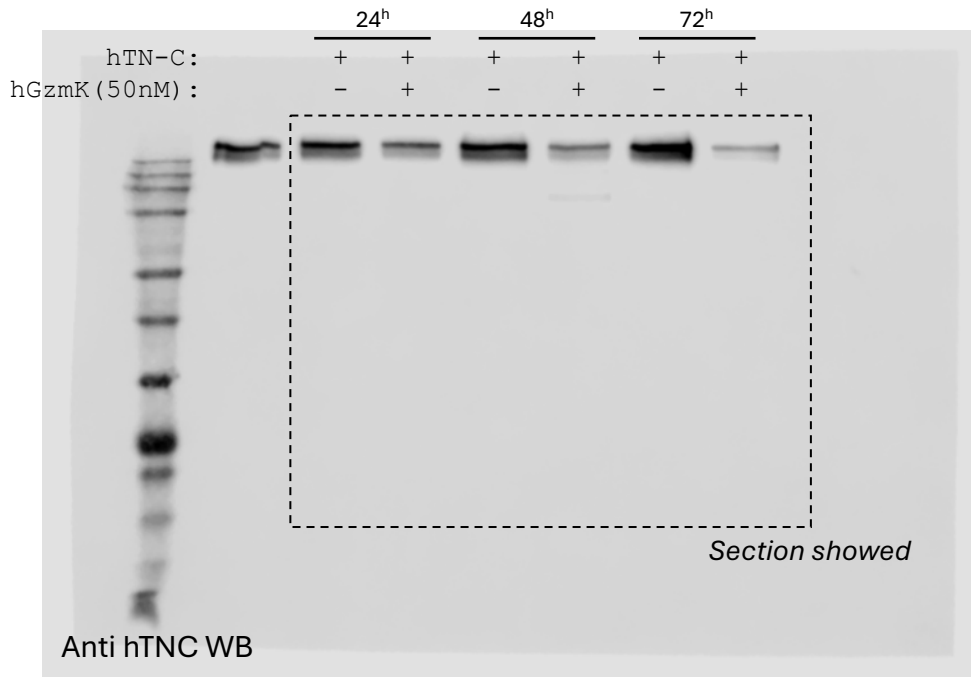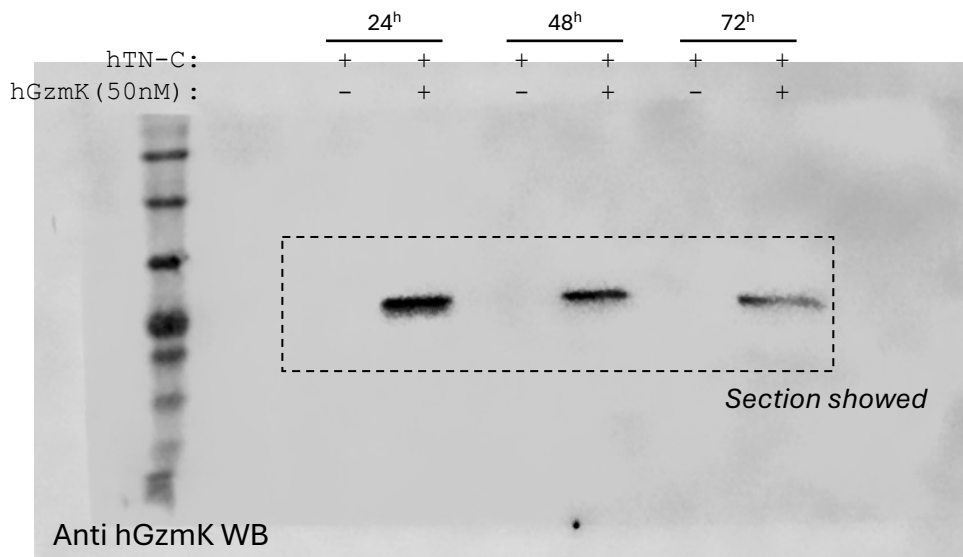

# Full unedited membranes for figure 6A - right panel (100nM GzmK)

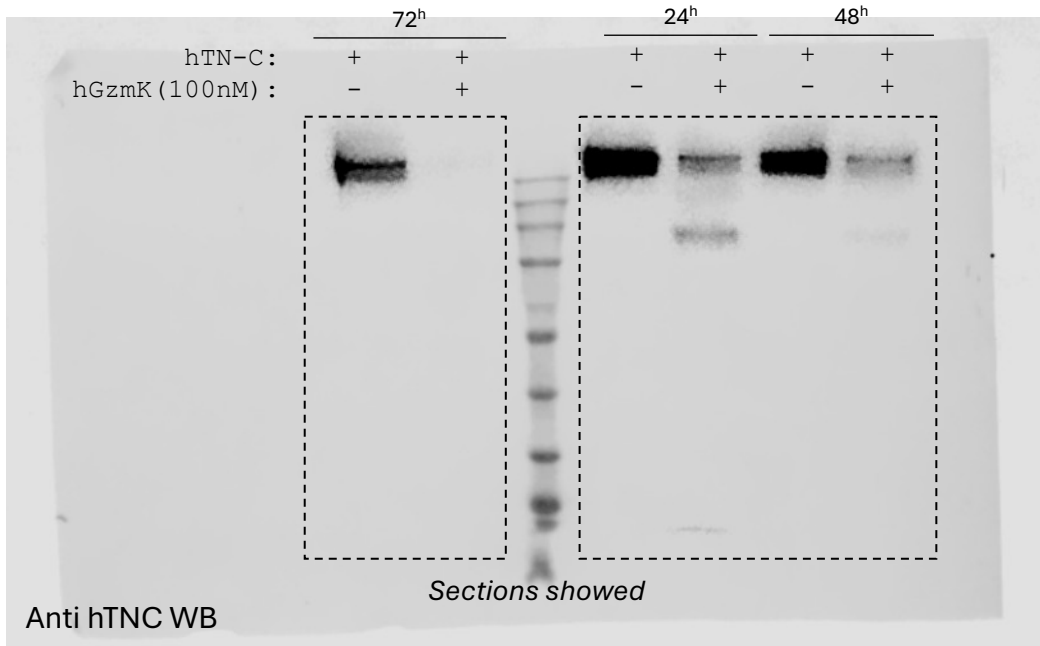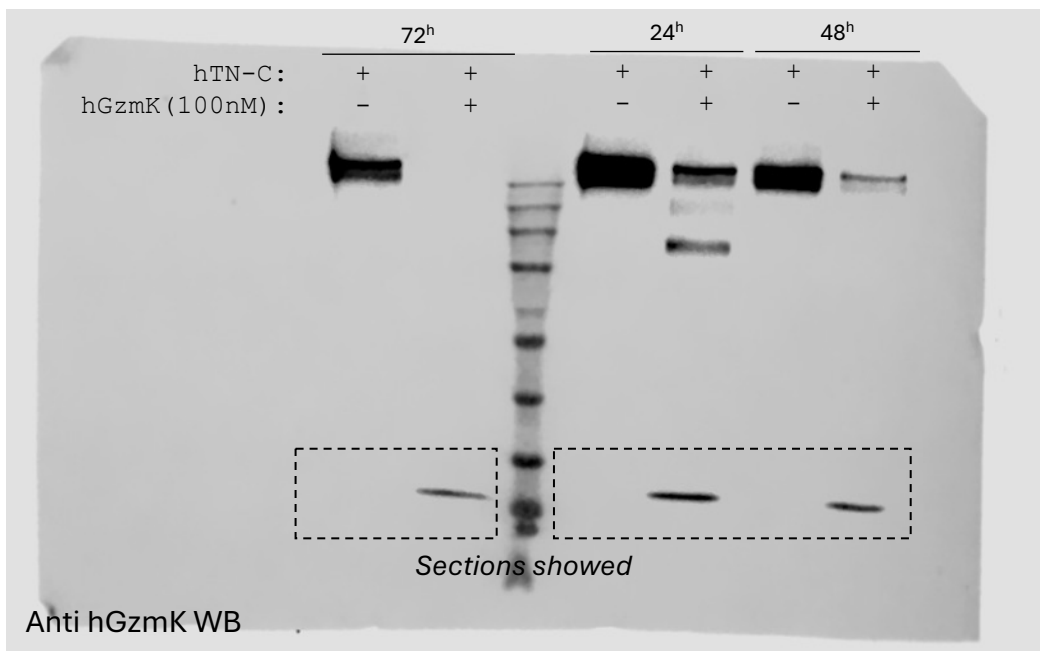

Supplement: jciinsight-9-181935-s011.pdf [file jciinsight-9-181935-s011.pdf]
